# Supplementary material for: Comparison of the octadentate bifunctional chelator DFO*-pPhe-NCS and the clinically used hexadentate bifunctional chelator DFO-pPhe-NCS for 89Zr-immuno-PET
Source: Springer Nature journal article supplement (doi:10.1007/s00259-016-3499-x), 2016-08-30
Supplement: MOESM3 [file 10632174]

## Supplemental material to

### Comparison of the octadentate bifunctional chelator DFO\*-*p*Phe-NCS and the clinically used hexadentate bifunctional chelator DFO-*p*Phe-NCS for <sup>89</sup>Zr-immuno-PET

Danielle J. Vugts,<sup>1</sup> Chris Klaver,<sup>1</sup> Claudia Sewing,<sup>1</sup> Alex J. Poot,<sup>1</sup> Kevin Adamzek,<sup>1</sup> Seraina Huegli,<sup>2</sup> Cristina Mari,<sup>2</sup> Gerard W.M. Visser,<sup>1</sup> Ibai E. Valverde,<sup>3</sup> Gilles Gasser,<sup>2</sup> Thomas L. Mindt,<sup>4,5</sup> Guus A.M.S. van Dongen.<sup>1</sup>

<sup>1</sup> VU University Medical Center, Dept. of Radiology & Nuclear Medicine, Amsterdam, The Netherlands

<sup>2</sup> University of Zurich, Department of Chemistry, Zurich, Switzerland

<sup>3</sup> University of Basel Hospital, Division of Radiopharmaceutical Chemistry, Basel, Switzerland

<sup>4</sup> ETH Zurich, Institute of Pharmaceutical Sciences, Zurich, Switzerland

<sup>5</sup> Ludwig Boltzmann Institute for Applied Diagnostics, General Hospital of Vienna, Vienna, Austria

#### Table of contents

|                                                                                                                                              |    |
|----------------------------------------------------------------------------------------------------------------------------------------------|----|
| General analyses                                                                                                                             | 2  |
| Synthesis of DFO*- <i>p</i> Phe-NCS                                                                                                          | 2  |
| Fig. S1 <sup>1</sup> H-NMR spectrum of DFO*- <i>p</i> Phe-NCS                                                                                | 3  |
| Fig. S2 <sup>13</sup> C-NMR spectrum of DFO*- <i>p</i> Phe-NCS                                                                               | 4  |
| Fig. S3 HPLC spectrum of DFO*- <i>p</i> Phe-NCS at 275 nm                                                                                    | 5  |
| Fig. S4 HR-MS spectrum of DFO*- <i>p</i> Phe-NCS                                                                                             | 6  |
| Fig. S5 Uptake of <sup>89</sup> Zr-DFO*-trastuzumab and <sup>89</sup> Zr-DFO-trastuzumab in sternum, femur and knee at 24, 72 and 144 h p.i. | 7  |
| Fig. S6 Ratio of <sup>89</sup> Zr-DFO-trastuzumab/ <sup>89</sup> Zr-DFO*-trastuzumab at 24, 72 and 144 h p.i.                                | 8  |
| Fig. S7 SE-HPLC chromatograms of <sup>89</sup> Zr-DFO*-trastuzumab in 0.9% NaCl                                                              | 9  |
| Fig. S8 SE-HPLC chromatogram of <sup>89</sup> Zr-DFO-trastuzumab in 0.9% NaCl                                                                | 10 |
| Table S1 <i>In vitro</i> stability of <sup>89</sup> Zr-DFO*-trastuzumab and <sup>89</sup> Zr-DFO-trastuzumab at RT                           | 11 |
| Summary of radiolabeling results and QC data of <sup>89</sup> Zr-DFO*-cetuximab and <sup>89</sup> Zr-DFO*-rituximab                          | 12 |

## General analyses

$^1\text{H}$ -NMR and  $^{13}\text{C}$ -NMR spectra were measured with a Bruker ARX-400 or Bruker ARX-500 at room temperature. Chemical shifts ( $\delta$ ) are reported in ppm (parts per million) and coupling constant  $J$  in Hz. Residual solvent peaks were used as an internal reference. Abbreviations for the peak multiplicities are s (singlet), d (doublet), t (triplet), m (multiplet), br (broad). High resolution ESI-MS spectra were recorded using a Bruker ESQUIRE-LC quadrupole ion trap instrument. Ultra-performance liquid chromatography mass spectrometry (UPLC-MS) was performed with a Waters Acquity UPLC System with an Acquity UPLC PDA Detector and an Acquity UPLC BEH  $\text{C}_{18}$  1.7  $\mu\text{m}$  reverse phase column (2.1 x 50 mm); flow rate: 0.6 mL/min with a gradient of A ( $\text{H}_2\text{O}$  containing 0.1% formic acid) and B (acetonitrile):  $t = 0$  min, 5% B;  $t = 0.5$  min, 5% B;  $t = 4$  min, 100% B;  $t = 5$  min, 100% B. DFO\*-*p*Phe-NCS was purified by preparative HPLC on a Phenomenex Jupiter 4u Proteo 90A (21.2 x 250 mm) column at a flow rate of 20 mL/min with a gradient of A (acetonitrile; Sigma-Aldrich HPLC-grade) and B (distilled water containing 0.1% TFA):  $t=0$  min, A 5%;  $t=12$  min, A 15%;  $t=24$  min, A 35%;  $t=26$  min, A 100%;  $t=28$  min, A 100%;  $t=30$  min, A 15%.

## Synthesis of DFO\*-*p*Phe-NCS

DFO\* (50 mg, 0.066 mmol) was dissolved in a mixture of *i*-PropOH/ $\text{H}_2\text{O}$  (4:1; 8 mL) and added dropwise to a solution of *p*-phenylenediisothiocyanate (126 mg, 0.66 mmol, 10 eq) and  $\text{Et}_3\text{N}$  (11  $\mu\text{L}$ , 0.079 mmol) in  $\text{CHCl}_3$  (8 mL). The reaction mixture was stirred at room temperature for 24 h, concentrated under reduced pressure and the resulting white solid was washed with  $\text{Et}_2\text{O}$  (4 x 10 mL). The product was purified by preparative HPLC to provide, after lyophilization, a white powder (6 mg, 10%, purity according to UPLC-MS at 275 nm >95%).  $^1\text{H}$ -NMR (600 MHz,  $\text{DMSO-d}_6$ ):  $\delta$ (ppm) 9.64 (br m, 5 H), 7.90 (br s, 1 H), 7.77 (br s, 3 H), 7.54 (d,  $J = 12$  Hz, 2 H), 7.36 (d,  $J = 6$  Hz, 2 H), 3.41-3.49 (m, 10 H), 2.97-3.03 (m, 6 H), 2.55-2.60 (m, 6 H), 2.23-2.3 (m, 6 H), 1.97 (s, 3 H), 1.48-1.51 (m, 10 H), 1.36-1.39 (m, 6 H), 1.19-1.21 (m, 8 H).  $^{13}\text{C}$ -NMR (125 MHz,  $\text{DMSO-d}_6$ ):  $\delta$ (ppm) 180.1, 172.0, 171.3, 170.2, 139.3, 132.6, 126.2, 124.6, 123.1, 47.1, 46.8, 43.7, 38.4, 29.9, 28.8, 28.0, 27.6, 27.1, 26.0, 23.6, 23.5, 20.4. Some carbon signals were not observed due to overlapping signals. HR-ESI-MS: calcd for  $\text{C}_{42}\text{H}_{68}\text{N}_{10}\text{O}_{11}\text{S}_2$   $[\text{M}+\text{H}]^+$  953.45887, found 953.45832.

The moderate yield of isolated DFO\*-*p*Phe-NCS does not reflect low conversion of substrates or reagents but the challenging purification by HPLC due to low solubility of the compound in water and most organic solvents.

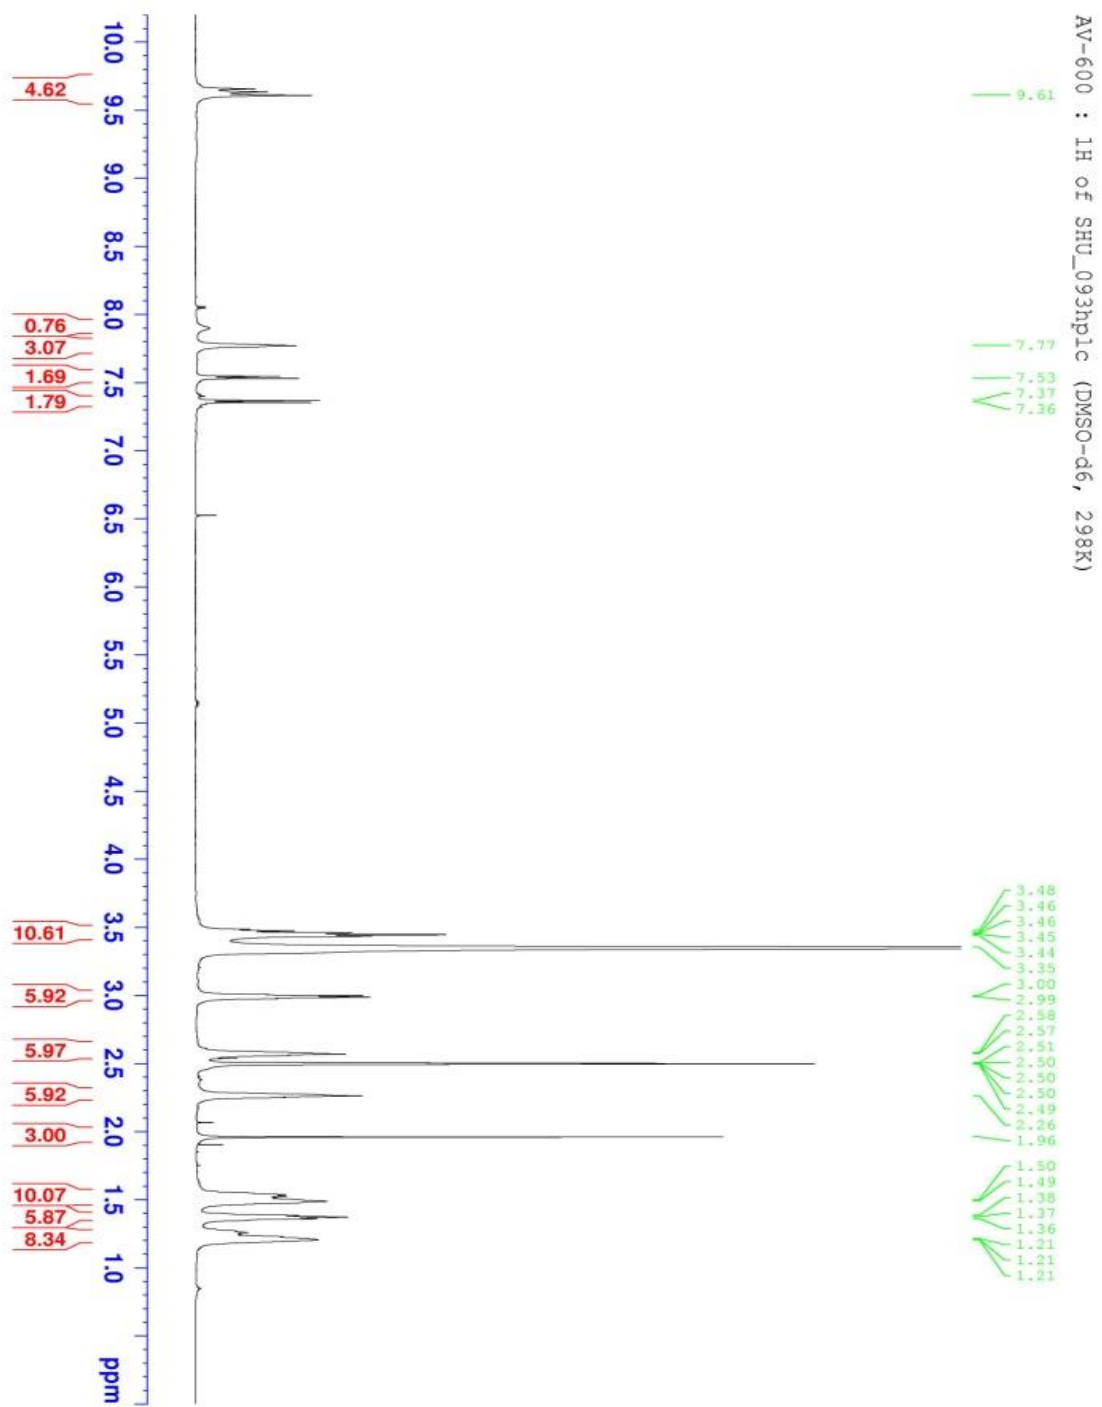

Fig. S1 <sup>1</sup>H-NMR spectrum of DFO\*-*p*Phe-NCS



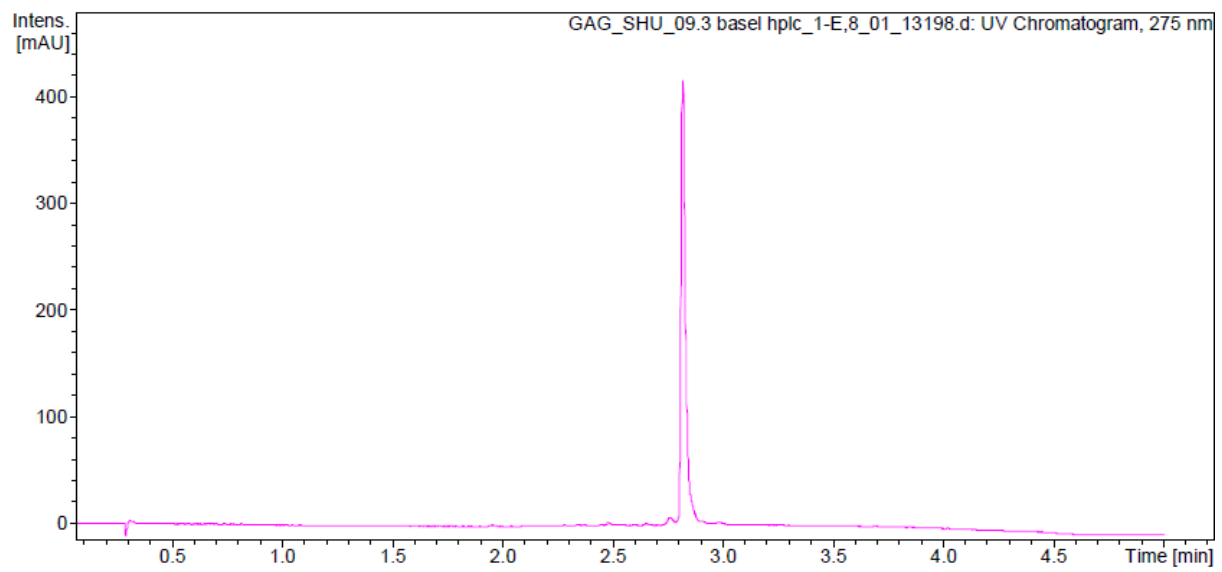

**Fig. S3** HPLC analysis of DFO\*-*p*Phe-NCS at 275 nm

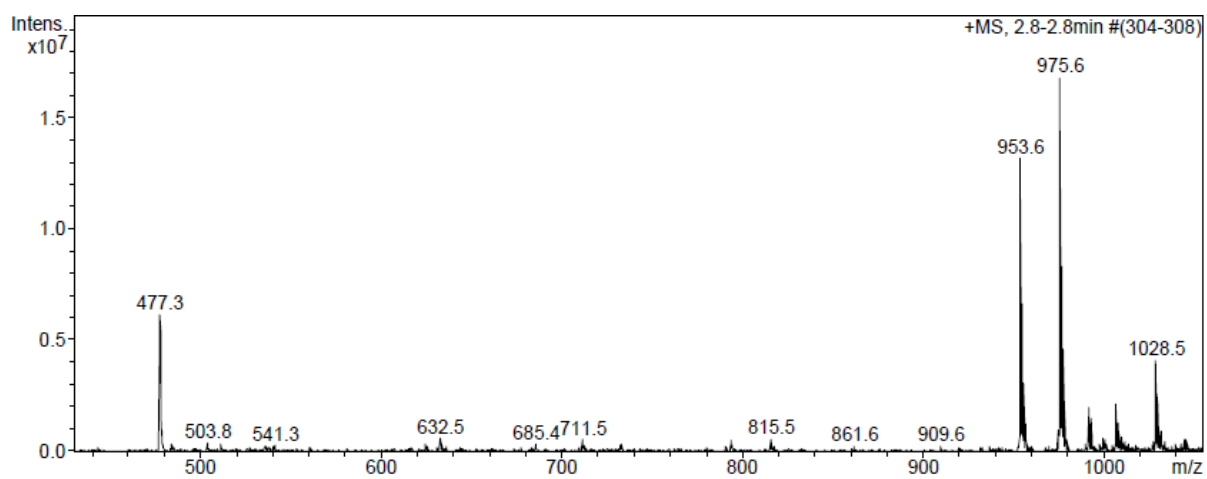

HR-ESI calcd for C<sub>42</sub>H<sub>68</sub>N<sub>10</sub>O<sub>11</sub>S<sub>2</sub>/z [M+H]<sup>+</sup> 953.45887, found 953.45832, calcd for

C<sub>42</sub>H<sub>68</sub>N<sub>10</sub>O<sub>11</sub>NaS<sub>2</sub>/z [M+Na]<sup>+</sup> 975.44027, found 975.44027

**Fig. S4** HR-MS spectrum of DFO\*-*p*Phe-NCS

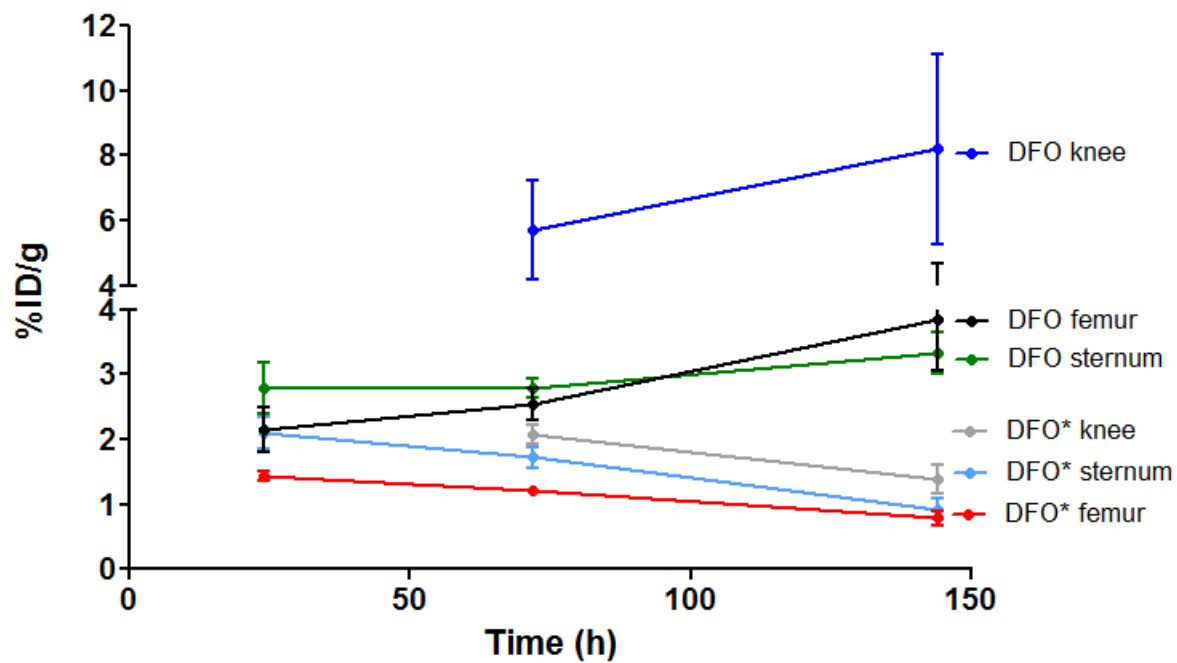

**Fig. S5** %ID/g in sternum, femur and knee for <sup>89</sup>Zr-DFO\*-trastuzumab and <sup>89</sup>Zr-DFO-trastuzumab over time.

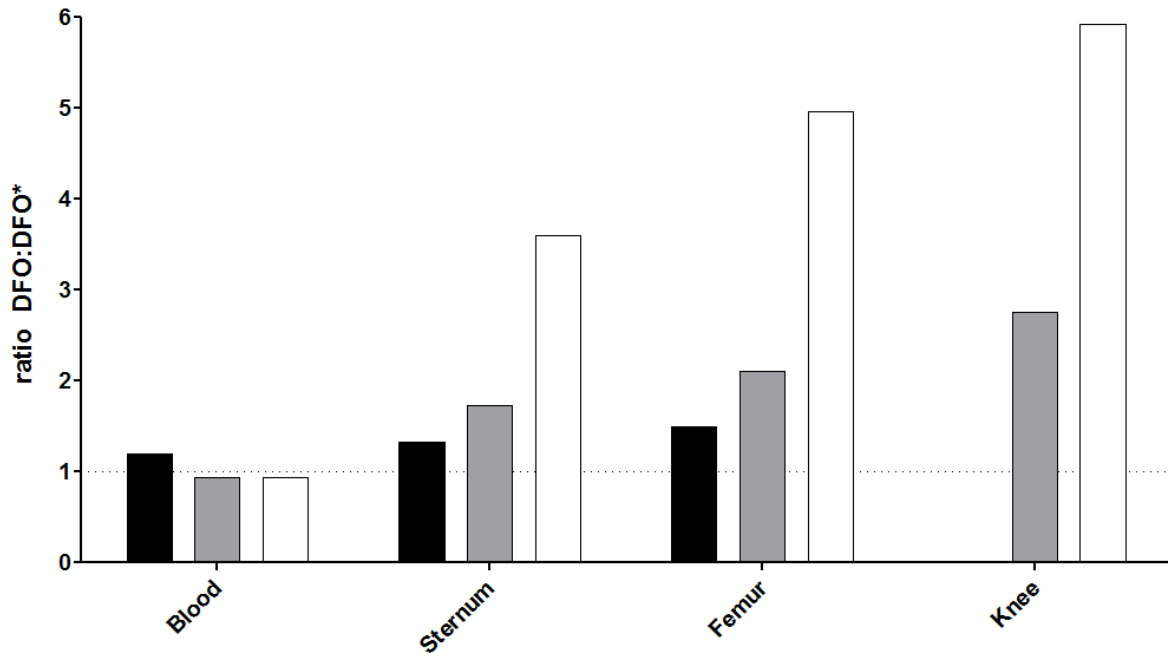

**Fig. S6** Ratio of  $^{89}\text{Zr}$ -DFO-trastuzumab/ $^{89}\text{Zr}$ -DFO\*-trastuzumab in N87 tumor bearing nude mice at 24 h (black bar); 72 h (grey bar) and 144 h (white bar) after administration in blood, sternum, femur and knee.



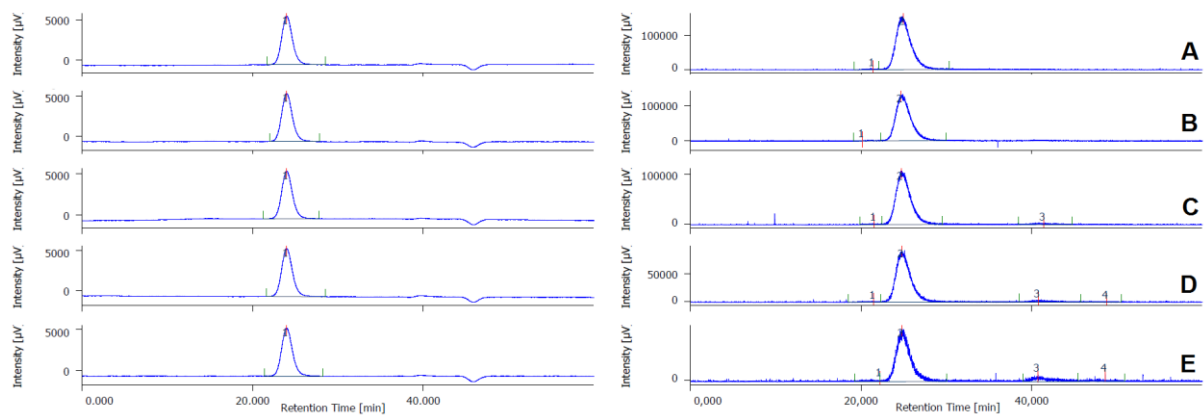

**Fig. S7** SE-HPLC chromatogram of  $^{89}\text{Zr}$ -DFO\*-trastuzumab directly after formulation (A) and after storage at 2-8°C for 24 h (B), 48 h (C), 72 h (D) and 168 h (E) in 0.9% NaCl. Left: UV at 280 nm and right: radioactive read-out.

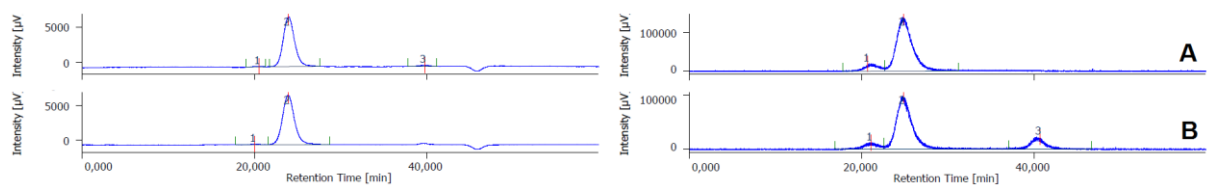

**Fig. S8** SE-HPLC chromatogram of  $^{89}\text{Zr}$ -DFO-trastuzumab directly after formulation (A) and after storage at 2-8°C for 24 h (B) in 0.9% NaCl. Left: UV at 280 nm and right: radioactive read-out.

**Table S1** *In vitro* stability of <sup>89</sup>Zr-DFO\*-trastuzumab (A) and <sup>89</sup>Zr-DFO-trastuzumab (B) in 20 mM histidine+ 240 mM sucrose and 0.9% NaCl at room temperature

| A     | 20 mM Histidine/240 mM sucrose |                             | 0.9% NaCl                |                             |
|-------|--------------------------------|-----------------------------|--------------------------|-----------------------------|
|       | 21°C                           |                             | 21°C                     |                             |
|       | Radiochemical purity (%)       | Immunoreactive fraction (%) | Radiochemical purity (%) | Immunoreactive fraction (%) |
| 0 h   | 99.0                           | 98                          | 98.0                     | 97                          |
| 24 h  | 98.3                           | 96                          | 97.3                     | 95                          |
| 48 h  | 96.8                           | 95                          | 93.5                     | 91                          |
| 72 h  | 94.7                           | 93                          | 90.7                     | 87                          |
| 168 h | 84.1                           | 81                          | 76.5                     | 72                          |
|       |                                |                             |                          |                             |
| B     | 20 mM Histidine/240 mM sucrose |                             | 0.9% NaCl                |                             |
|       | 21°C                           |                             | 21°C                     |                             |
|       | Radiochemical purity (%)       | Immunoreactive fraction (%) | Radiochemical purity (%) | Immunoreactive fraction (%) |
| 0 h   | 97.8                           | 96                          | 98.6                     | 97                          |
| 24 h  | 96.5                           | 94                          | 75.2                     | nd                          |
| 48 h  | 95.6                           | 92                          | 57.3                     | nd                          |
| 72 h  | 92.9                           | 92                          | 41.1                     | nd                          |
| 168 h | 87.5                           | 85                          | 42.7                     | nd                          |

nd = not determined

Radiochemical purity of buffer samples determined by spin filter.

Radiochemical purity of serum samples determined by SEC-HPLC.

## Summary of radiolabeling results and QC data of $^{89}\text{Zr}$ -DFO\*-cetuximab and rituximab

### $^{89}\text{Zr}$ -DFO\*-cetuximab

Radiolabeling efficiency: 87%

Radiochemical purity (HPLC): 100%

(spin filter): 99.7%

Immunoreactive fraction: 99% (A431 fixated cells)

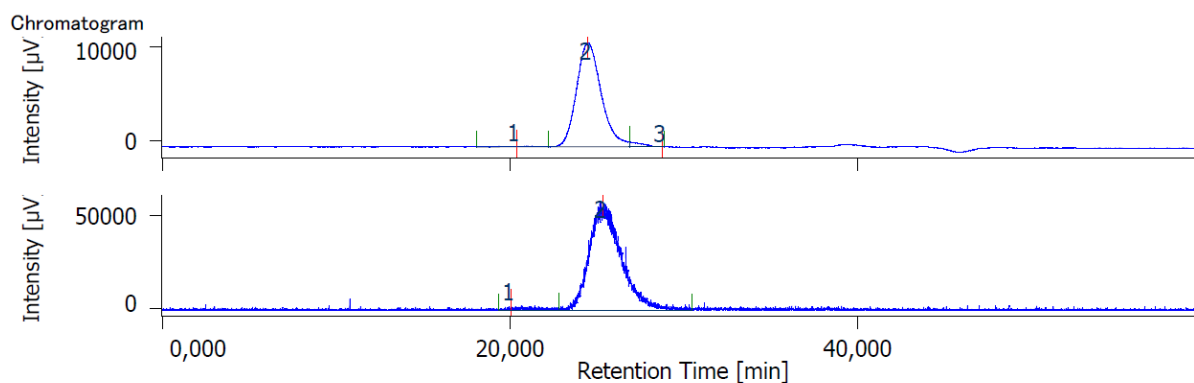

**Fig. S9** SE-HPLC chromatogram of  $^{89}\text{Zr}$ -DFO\*-rituximab. Top: UV at 280 nm and bottom: radioactive read-out.

### $^{89}\text{Zr}$ -DFO\*-rituximab

Radiolabeling efficiency: 89%

Radiochemical purity (HPLC): 100%

(spin filter): 99.4%

Immunoreactive fraction: 90% (SU-DHL4 fixated cells)

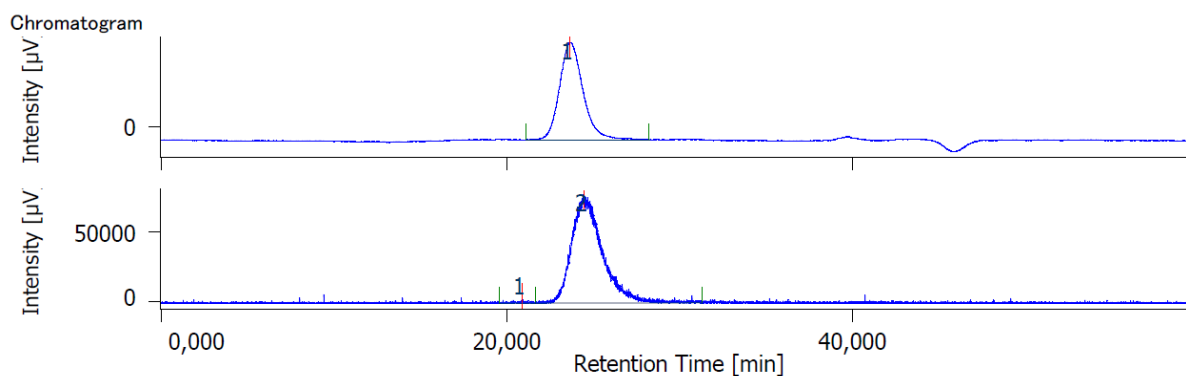

**Fig. S10** SE-HPLC chromatogram of  $^{89}\text{Zr}$ -DFO\*-rituximab. Top: UV at 280 nm and bottom: radioactive read-out.
